# Supplementary material for: The Influence of Environmental Factors on the Quality of GPR Data: The Borre Monitoring Project
Source: MDPI journal article supplement (doi:10.3390/rs14143289), 2022-07-08
Supplement: s1 [file s1]

Archive with 1 entries (1 files):
- remotesensing-1725950-supplementary.pdf
